# Supplementary material for: Iron homeostasis in Mycobacterium tuberculosis is essential for persistence
Source: PubMed Central journal article supplement (PMC6255865; doi:10.1038/s41598-018-35012-3), 2018-11-26
Supplement: 41598_2018_35012_MOESM1_ESM.pdf [file 41598_2018_35012_MOESM1_ESM.pdf]

**Title: Iron homeostasis in *Mycobacterium tuberculosis* is essential for persistence**

**Manitosh Pandey<sup>1</sup>, Sakshi Talwar<sup>1</sup> , Sutapa Bose<sup>2</sup> and Amit Kumar Pandey<sup>1\*</sup>**

<sup>1</sup>Mycobacterial Pathogenesis Laboratory, Translational Health Science and Technology Institute (THSTI), Faridabad 121001, Haryana, India;

<sup>2</sup>Environmental Science Research Laboratory, Dept. of Earth Sciences, Indian Institute of Science Education and Research, Kolkata, Nadia, India.

\*Correspondence and requests for materials should be addressed to A.K.P. (email: amitpandey@thsti.res.in)

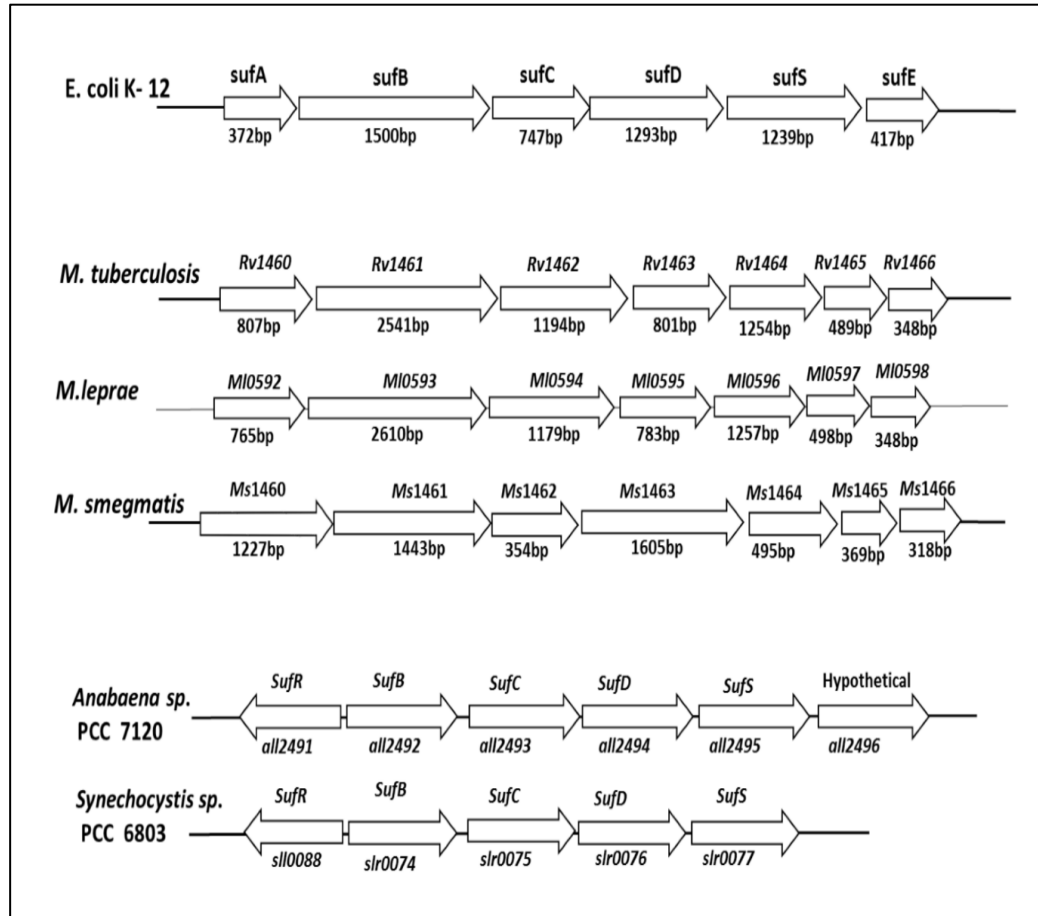

**Supplementary Figure: 1**

A

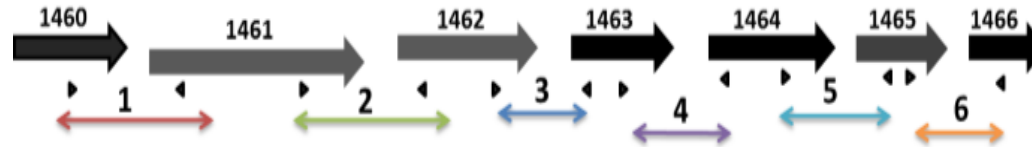

B

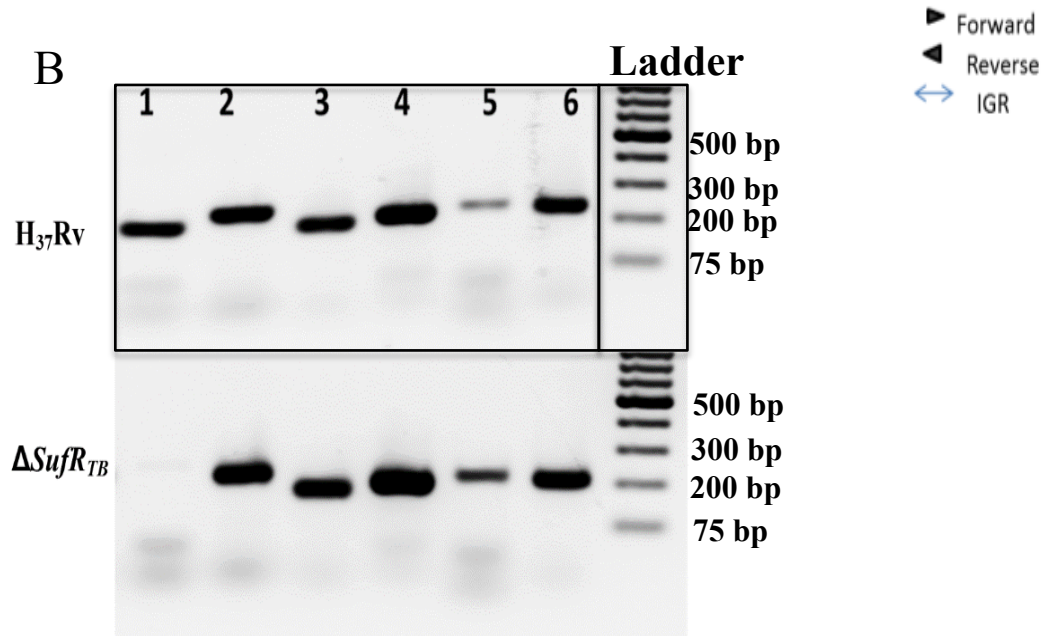

**Supplementary Figure: 2**

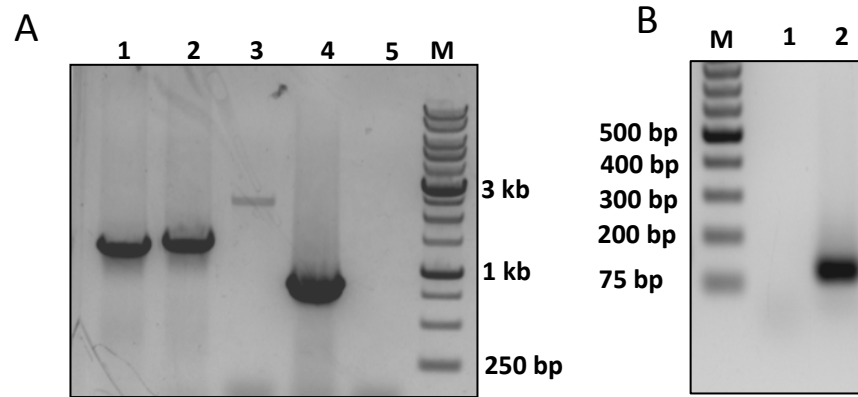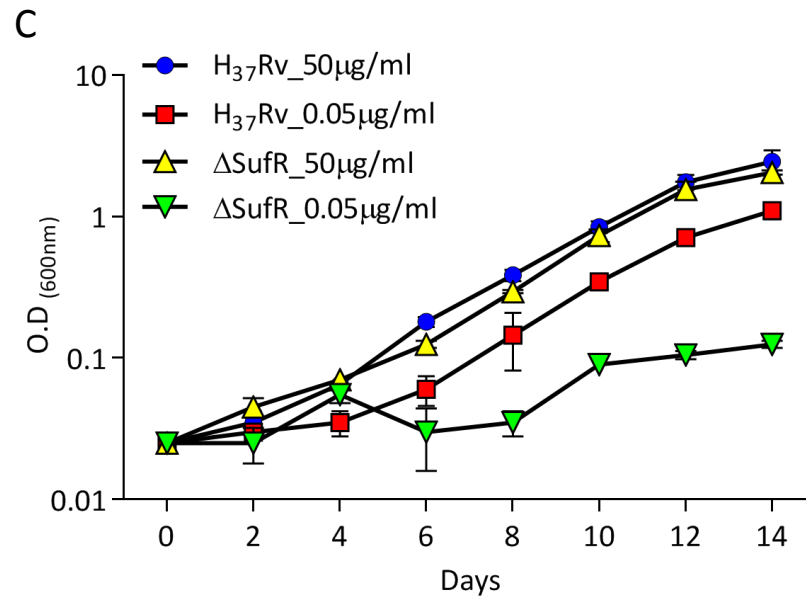

**Supplementary Figure: 3**

**A**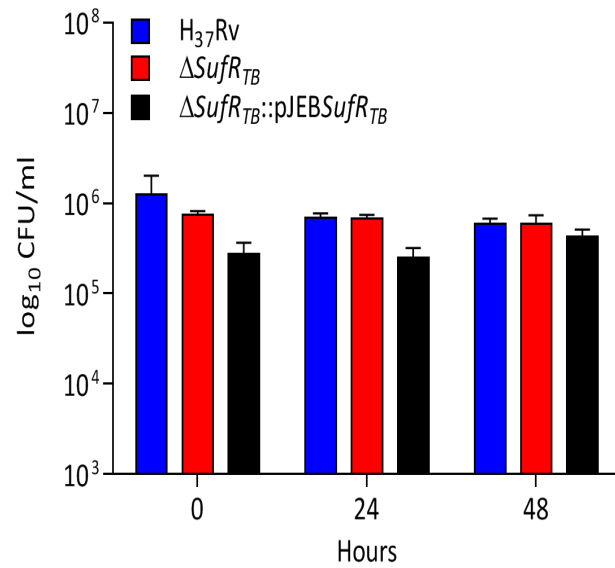**B**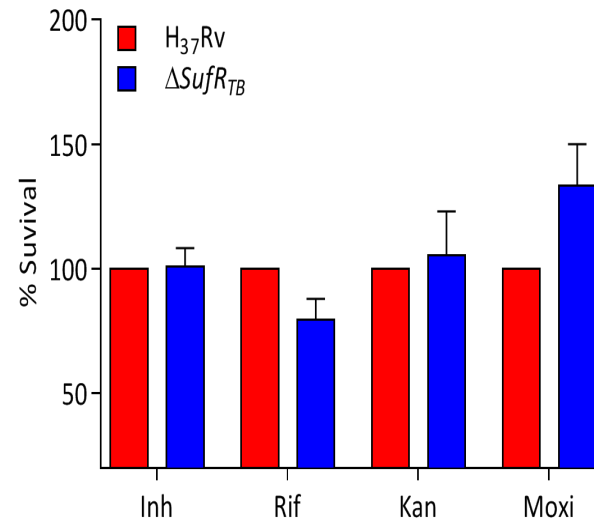**Supplementary Figure: 4**

A

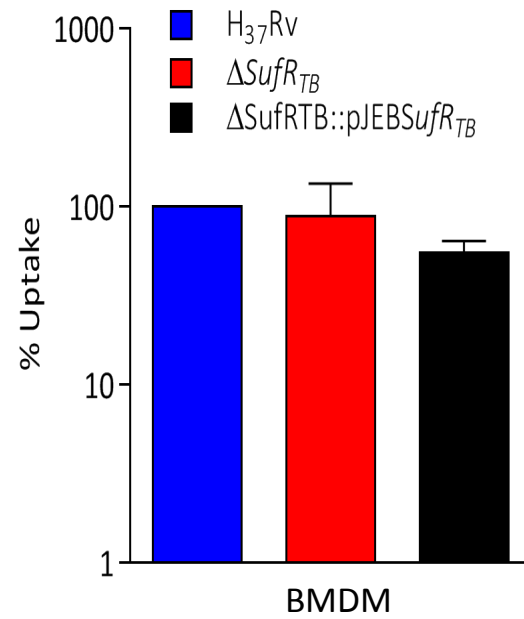

**Supplementary Figure: 5**

## Supplementary figure Legends

**Supplementary Figure 1: Map depicting comparative gene organization of the ISC locus in different bacteria.** The gene organization of the ISC locus from three mycobacterial species were compared with the available sequence of *Synechocystis* sp. Strain PCC 6803, *Anabaena* sp. Strain PCC 7120 and the *E. coli* genome sequence. The arrows indicate the direction of the transcription.

**Supplementary Figure 2: Transcript analysis of Suf operon in Mtb** **A.** Schematic representation of ISC operon in Mtb, arrowheads show the primers used for the transcript analysis. **B.** PCR amplification of intergenic regions using cDNA from wild type and  $\Delta$  *sufR*<sub>TB</sub> strains as a template.

**Supplementary Figure 3: Mutant confirmation:** **A.** *sufR*<sub>TB</sub> gene deletion mutant ( $\Delta$ *sufR*<sub>TB</sub>) confirmation by PCR. Lane 1 & 2: Amplification of the *sufR* flanking region confirms gene specific insertion of the hygromycin cassette, Lane 3: 2.0 kb amplicon using *sufR*<sub>TB</sub> gene specific primers further confirms the insertional deletion of the *sufR*<sub>TB</sub> gene, lane 4: Depicts amplification of *sufR*<sub>TB</sub> gene (807bp) using H37Rv genomic DNA as a positive control, lane 5: No template control. **B.** The absence of *sufR* transcript in  $\Delta$  *sufR*<sub>TB</sub> strains is further confirmed by semi-quantitative PCR using  $\Delta$  *sufR*<sub>TB</sub> cDNA as a template (Lane 1) and wild type H37Rv (Lane 2) strains. **C.** Growth kinetics of unmarked *sufR*<sub>TB</sub> gene in minimal media at different iron concentrations.

**Supplementary Figure 4: SDS and Drugs susceptibility assay:** **A.** Survival of wild type, mutant and complemented strain in 7H9 enriched media containing 0.1% SDS. Growth differences were estimated by CFU plating at 24 and 48 hours post treatment. **B.** Survival of wild type, mutant and complemented strain in 7H9 enriched media containing 1X MIC of different anti TB drugs. Difference was estimated by CFU plating at 72 Hours.

**Supplementary Figure 5: Drugs susceptibility:** **A.** Survival of wild type, mutant and complemented strain in 7H9 enriched media with MIC of different anti TB drugs. Difference was estimated by CFU plating at 72 Hours.

**Supplementary Figure 6: BMDM uptake assay:** **A.** Relative uptake of H37Rv,  $\Delta$  *sufR<sub>TB</sub>* and  $\Delta$  *sufR<sub>TB</sub>*:pJEB *sufR<sub>TB</sub>*) in bone marrow derived macrophages, 4 hours post infection.



**Table: S1**  
**Mutant confirmation primers**

| <b>Primer</b> | <b>Sequence</b>                 |
|---------------|---------------------------------|
| 1460_F1       | ATGATATCATTCCGGACGGGGTTTGACTG   |
| 1460_R1       | ATGCGGCCGCTGATCGGTCTACCAGGGATGC |
| 1460_F2       | ATCTCGAGGGAGCGTCCCGATGACAC      |
| 1460_R2       | ATGGGCCCTTCAGCCTTCCACCCATTGCG   |
| Rv1460-conf1  | CAGCGTGATCAGGATGGAACC           |
| Rv1460-conf2  | GGTAGATCAGGAAGTCACCCTC          |

**Table: S2**  
**Quantitative analysis primers**

| <b>Primers</b> | <b>Sequence</b>          |
|----------------|--------------------------|
| 1460-RT-F      | ATCGCAACGGCGCTCAGCAAAG   |
| 1460-RT-R      | CTGCTGCTCGGTTTCGCACAAT   |
| 1461-RT-F      | CGTTCCAGTTGCAGTCCATCC    |
| 1461-RT-R      | CACCTGGTAGATGTCCTTGCGAAC |
| 1462-RT-F      | CGACAACACCGTTCACCTCAGC   |
| 1462-RT-R      | CGTCGTCGGCGAAATACAGC     |
| 1463-RT-F      | CTGGGTCAAAGAGGTCAAGGC    |
| 1463-RT-R      | GCGATCTTGGGCTTGAGCAG     |
| 1464-RT-F      | GGCCCCGGCGACGTGATCGT     |
| 1464-RT-R      | GTCCAGATACAGCGAGTCCAG    |
| 1465-RT-F      | CACTACAAGCATCCGCAGCATC   |
| 1465-RT-R      | ACAGCCTTGTCCGTCATAGGAAAC |
| 1466-RT-F      | GTGCAAGACGGTGACGAAGG     |
| 1466-RT-R      | CCCAGTTGATGCGGATGTCGTC   |
| 1460/61-RT-F   | CATCGTCAACGGAGACTGCG     |
| 1460/61-RT-R   | ATCGCCTCTTCCTGGGTCAG     |
| 1461/62-RT-F   | CTGTTCTACCTGATGAGCCGC    |
| 1461/62-RT-R   | TCGCCCTTGTTGTGTGCGATC    |
| 1462/63-RT-F   | CGCGGCTTCTTCGGTGAG       |
| 1462/63-RT-R   | TCCGCGGGGTTCTCCAC        |
| 1463/64-RT-F   | CGAACTCGACCAGAACGGC      |
| 1463/64-RT-R   | CCGGAGTCCAAATACGCCAAC    |
| 1464/65-RT-F   | GCGTCGTTGCGGGTGTAC       |
| 1464/65-RT-R   | GCCGCAGATCGGGTTCAC       |
| 1465/66-RT-F   | GTGAAATGCGCGCTGCTC       |
| 1465/66-RT-R   | CGTCCAAGCCGTAGACCAG      |
| SigA-RT-F      | GAGGACCACGAAGCCTCGAAG    |
| SigA-RT-R      | GTTTGAGGTAGGCGCGAACC     |

**Table: S3**  
**Strains and Plasmids**

| Strains/Plasmids                                                                  | Description                                                                     | Source                                        |
|-----------------------------------------------------------------------------------|---------------------------------------------------------------------------------|-----------------------------------------------|
| XL-1 Blue (E. coli)                                                               | recA1 endA1 gyrA96 thi-1hsdR17 supE44 relA1 lac [F' proAB lacIq ZM15 Tn (Tetr)] | Stratagene, USA                               |
| H <sub>37</sub> Rv                                                                | Laboratory strain of M.tb                                                       | A generous gift from Christopher M. Sassetti. |
| $\Delta$ sufR <sub>TB</sub> Rv1460 mutant                                         | Mutant strain of H <sub>37</sub> Rv                                             | This study                                    |
| $\Delta$ sufR <sub>TB</sub> (Unmarked strain)                                     | Unmarked mutant strain of H <sub>37</sub> Rv                                    | This study                                    |
| $\Delta$ sufR <sub>TB</sub> :pJEB $\Delta$ sufR <sub>TB</sub> Rv1460 complemented | Rv1460: kan complemented with Rv1460 at attB site.                              | This study                                    |
| pJM1                                                                              | Suicidal vector Hyg <sup>R</sup>                                                | A generous gift from Christopher M. Sassetti. |
| pJEB-402                                                                          | Shuttle vector kan <sup>K</sup>                                                 | A generous gift from Christopher M. Sassetti. |

**Table: S4**  
**Standard operating conditions of the ICP-MS used for the analysis**

| <b>PARAMETER</b>             | <b>ICPMS (Thermo Scientific X-Series 2)</b> |
|------------------------------|---------------------------------------------|
| RF Power                     | 4.2 Kw                                      |
| Carrier Gas Flow Rate        | 20 ml/min                                   |
| Collision Cell Gas           | He (93%) + H (7%)                           |
| Collision Cell Gas Flow Rate | 2-10 ml /min                                |
| Nebulizer Pump Rate          | 0.5 rps (30 RPM)                            |
| Uptake Time                  | 30 s                                        |
| Wash Time                    | 60- 70 s                                    |
| Standard Used (NIST 2711a)   | 2.82±0.04 (in %)                            |
